# Supplementary material
Source: publisher figshare collection journal article supplement (https://springernature.figshare.com/ndownloader/files/24107657)
Supplement: Supplementary file [file 24107657]

**Study Title: Development of mental healthcare in Cambodia: barriers and opportunities**

1. What is your professional experience of mental healthcare in Cambodia?
2. In your experience with developing mental health services in Cambodia - what has been successful and what has not been successful and why?
3. How can the currently available mental health resources (e.g. staff, funding) in Cambodia be used in a better way? What are the barriers for doing so?
4. How can Cambodia ensure that its mental health work force has the adequate clinical knowledge and skills needed for appropriate clinical care? What are the barriers to achieving this?
5. How can effective mental health leadership be achieved in Cambodia? What are the barriers to achieving such leadership?
6. What types of mental health care services do you think should Cambodia invest in?
7. Do you have any further thoughts or comments on the barriers to developing mental healthcare in Cambodia or other ideas how it could be improved?

*Please note: additional sub-questions may be used during the interviews if necessary to explain the question or to allow further elaboration of the interviewees answers.*
